# Supplementary material for: Efficacy of tofacitinib monotherapy in methotrexate-naive patients with early or established rheumatoid arthritis
Source: PubMed Central journal article supplement — RMD Open. 2016 Jul 26;2(2):e000262. doi: 10.1136/rmdopen-2016-000262 (PMC4964179; doi:10.1136/rmdopen-2016-000262), 2016-07-26
Supplement: rmdopen-2016-000262supp.pdf [file rmdopen-2016-000262supp.pdf]

**SUPPLEMENTARY MATERIAL**

**Supplementary Figure 1 Clinical response in patients with early and established RA at Month 12.**

**Additional Figure 1**

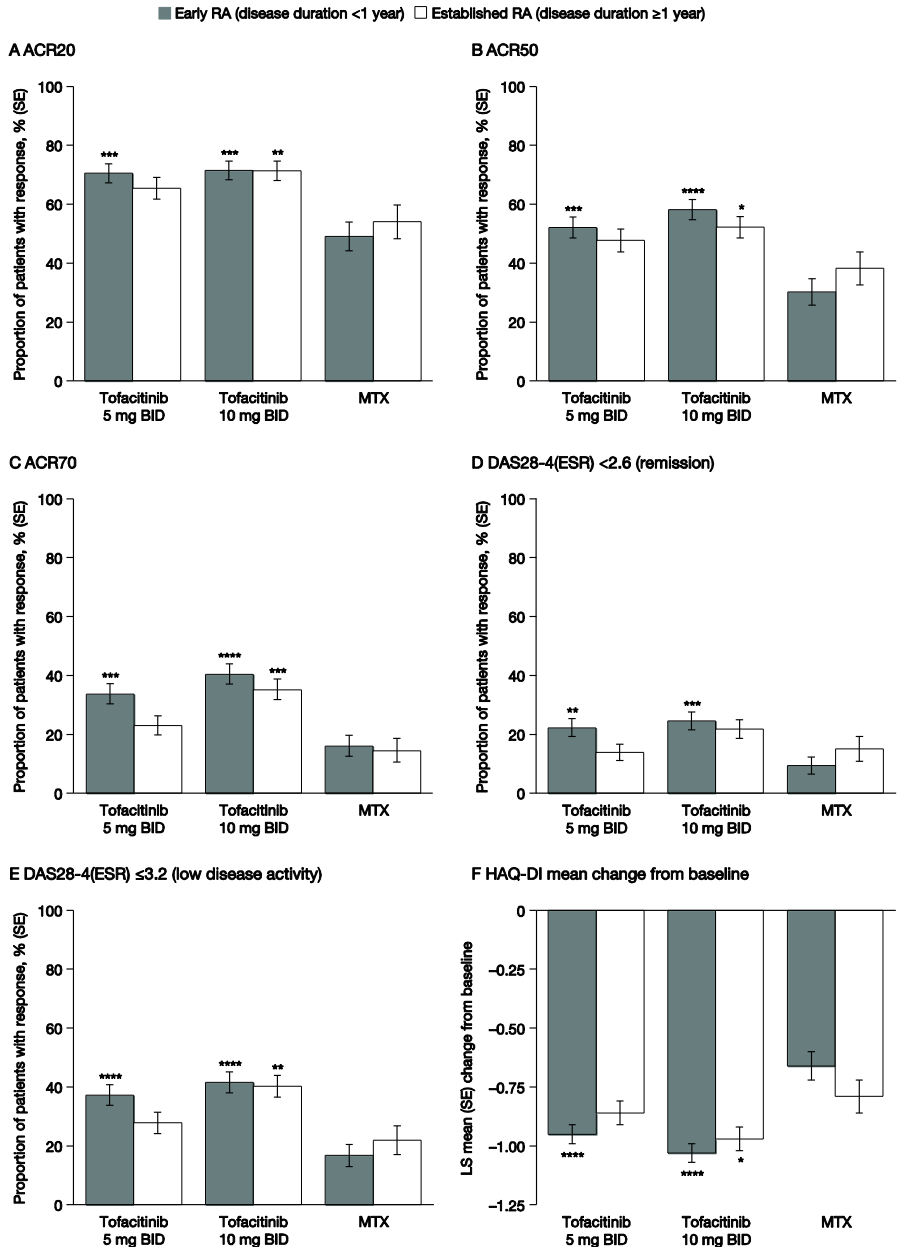

\*p<0.05; \*\*p<0.01; \*\*\*p<0.001; \*\*\*\*p<0.0001 versus MTX within disease duration category.

Early and established RA are defined as disease duration <1 year and ≥1 year, respectively.

ACR, American College of Rheumatology response criteria; BID, twice daily; DAS28-4(ESR), Disease Activity Score in 28 joints, erythrocyte sedimentation rate; HAQ-DI, Health Assessment Questionnaire-Disability Index; MTX, methotrexate; RA, rheumatoid arthritis; SE, standard error.

**Supplementary Figure 2** Radiographic parameters assessed at Month 12 in patients with early RA and established RA.

**Additional Figure 2**

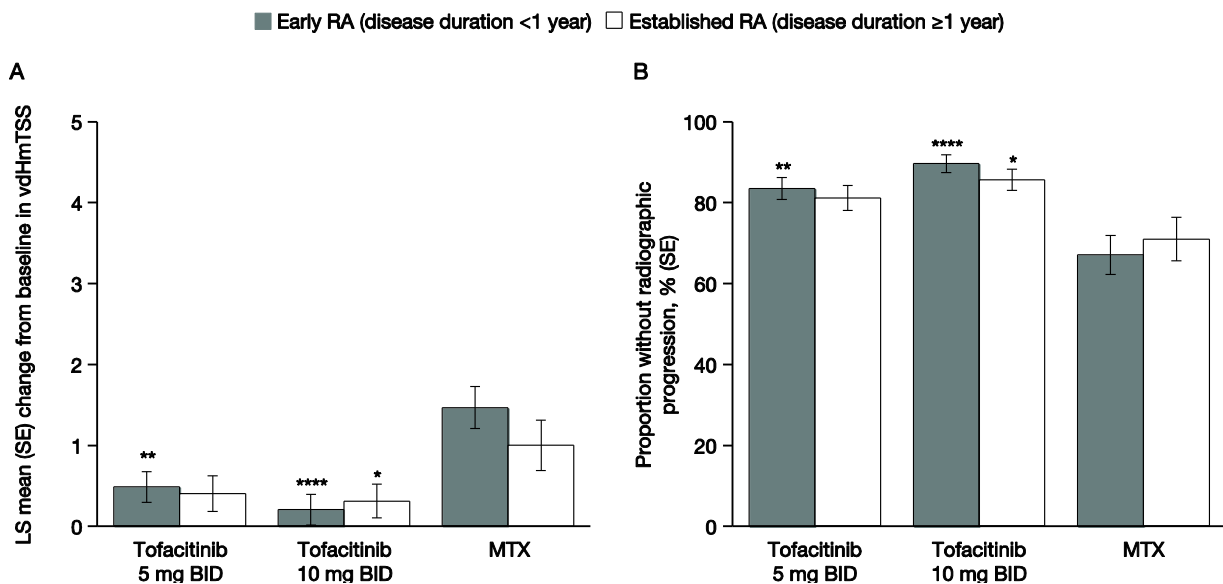

\*p<0.05; \*\*p<0.01; \*\*\*p<0.001; \*\*\*\*p<0.0001 versus MTX within disease duration category.

Early and established RA are defined as disease duration <1 year and ≥1 year, respectively. The proportion of patients without radiographic progression was determined based on a change in vdHmTSS ≤0.5.

BID, twice daily; LS, least squares; MTX, methotrexate; RA, rheumatoid arthritis; SE, standard error; vdHmTSS, van der Heijde modification of the total Sharp score.

**Supplementary Figure 3** Treatment differences versus MTX in patients with early and established RA at Month 12.

Additional Figure 3

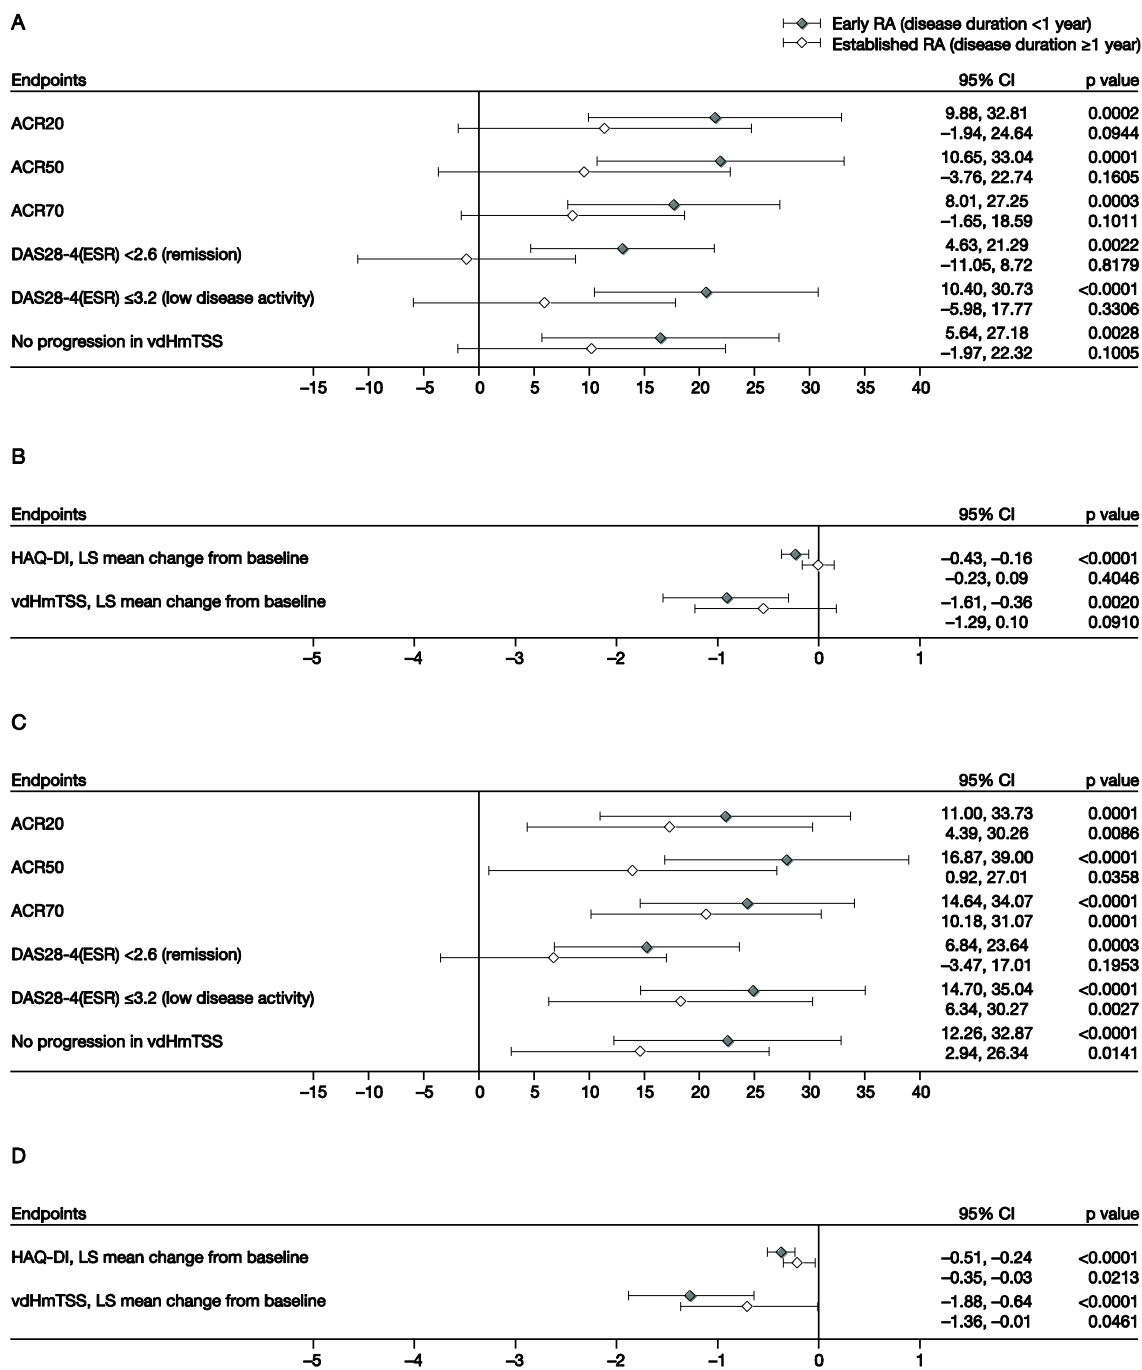

A–B tofacitinib 5 mg BID; C–D tofacitinib 10 mg BID.

Early and established RA are defined as disease duration <1 year and ≥1 year, respectively.

ACR, American College of Rheumatology response criteria; BID, twice daily; CI, confidence

interval; DAS28-4(ESR), Disease Activity Score in 28 joints, erythrocyte sedimentation rate; HAQ-DI, Health Assessment Questionnaire-Disability Index; LS, least squares; MTX, methotrexate; RA, rheumatoid arthritis; vdHmTSS, van der Heijde modification of the total Sharp score.

**Supplementary Figure 4** Clinical and radiographic endpoints ORs at Month 12 for patients with early and established RA.

Additional Figure 4

A

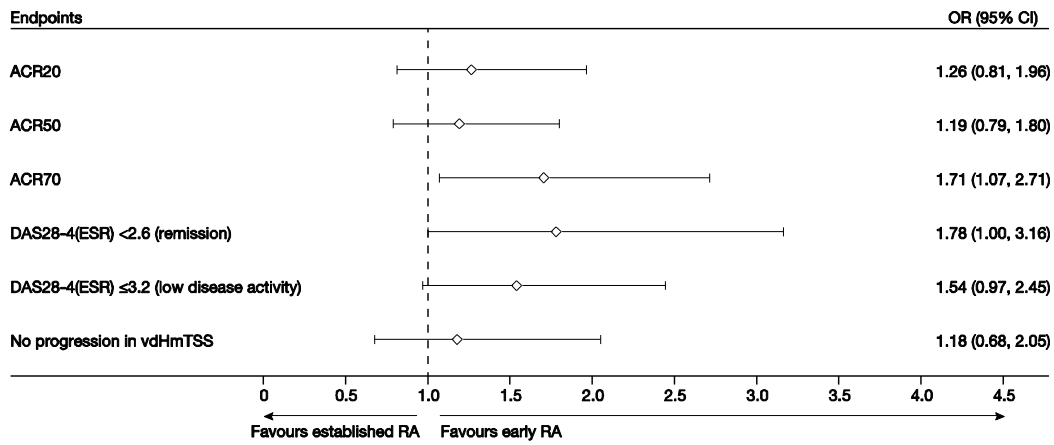

B

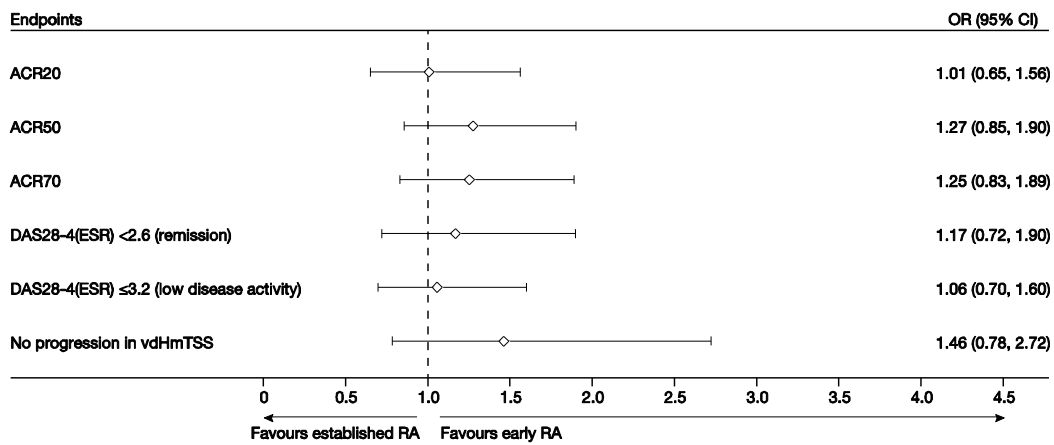

C

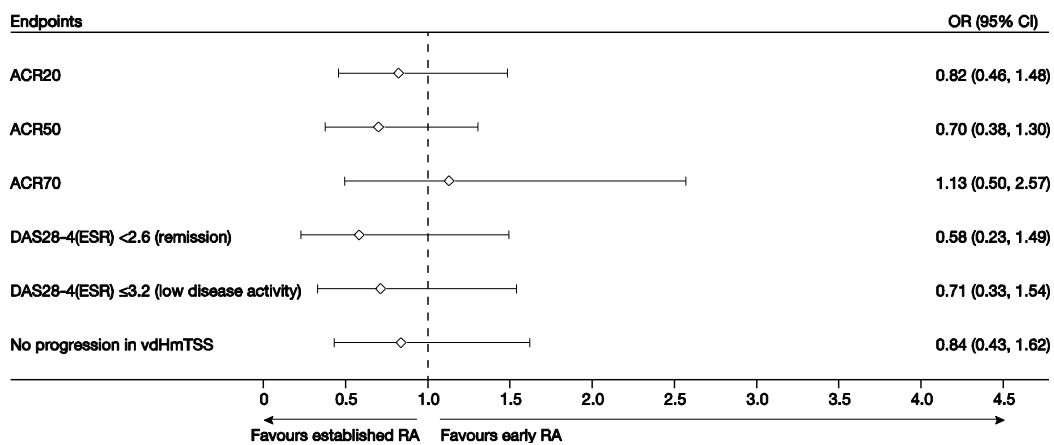

A tofacitinib 5 mg BID; B tofacitinib 10 mg BID; C MTX.

Early and established RA are defined as disease duration  $<1$  year and  $\geq 1$  year, respectively.

ACR, American College of Rheumatology response criteria; BID, twice daily; CI, confidence interval; DAS28-4(ESR), Disease Activity Score in 28 joints, erythrocyte sedimentation rate; MTX, methotrexate; OR, odds ratio; RA, rheumatoid arthritis; vdHmTSS, van der Heijde modification of the total Sharp score.

**Supplementary Table 1** Mean (SD) values for clinical and radiographic efficacy endpoints at Months 12 and 24.

| Duration of RA      | Tofacitinib 5 mg BID |               | Tofacitinib 10 mg BID |               | MTX           |               |
|---------------------|----------------------|---------------|-----------------------|---------------|---------------|---------------|
|                     | Early                | Established   | Early                 | Established   | Early         | Established   |
| <b>DAS28-4(ESR)</b> |                      |               |                       |               |               |               |
| Month 12            | 3.52 (1.25)          | 3.91 (1.41)   | 3.26 (1.30)           | 3.52 (1.28)   | 4.24 (1.34)   | 4.20 (1.45)   |
| Month 24            | 3.19 (1.21)          | 3.76 (1.25)   | 3.16 (1.24)           | 3.45 (1.35)   | 3.93 (1.27)   | 4.09 (1.45)   |
| <b>HAQ-DI</b>       |                      |               |                       |               |               |               |
| Month 12            | 0.51 (0.53)          | 0.81 (0.66)   | 0.46 (0.54)           | 0.58 (0.58)   | 0.78 (0.53)   | 0.81 (0.64)   |
| Month 24            | 0.44 (0.51)          | 0.77 (0.66)   | 0.41 (0.53)           | 0.56 (0.59)   | 0.68 (0.57)   | 0.91 (0.73)   |
| <b>vdHmTSS</b>      |                      |               |                       |               |               |               |
| Month 12            | 7.56 (14.01)         | 33.03 (51.51) | 5.26 (9.78)           | 31.93 (51.08) | 9.02 (15.47)  | 28.45 (40.49) |
| Month 24            | 8.31 (15.77)         | 33.25 (51.64) | 5.48 (9.87)           | 32.00 (51.13) | 10.18 (17.64) | 29.12 (40.74) |

Early RA was defined as disease duration <1 year, and established RA was defined as disease duration ≥1 year.

BID, twice daily; DAS28-4(ESR), Disease Activity Score in 28 joints, erythrocyte sedimentation rate; HAQ-DI, Health Assessment Questionnaire-Disability Index; MTX, Methotrexate; RA, rheumatoid arthritis; SD, standard deviation; vdHmTSS, van der Heijde modification of the total Sharp score.
